# Supplementary material for: Estimating the cold-induced brown adipose tissue glucose uptake rate measured by 18F-FDG PET using infrared thermography and water-fat separated MRI
Source: PubMed Central journal article supplement (PMC6710246; doi:10.1038/s41598-019-48879-7), 2019-08-26
Supplement: 41598_2019_48879_MOESM1_ESM.pdf [file 41598_2019_48879_MOESM1_ESM.pdf]

# Estimating the cold-induced brown adipose tissue glucose uptake rate measured by <sup>18</sup>F-FDG PET using infrared thermography and water-fat separated MRI

## Author list:

Jonathan Andersson<sup>a</sup>, Elin Lundström<sup>a</sup>, Mathias Engström<sup>b</sup>, Mark Lubberink<sup>a,c</sup>, Håkan Ahlström<sup>a,d</sup>, Joel Kullberg<sup>a,d</sup>

<sup>a</sup> Section of Radiology, Department of Surgical Sciences, Uppsala University, Uppsala, Sweden

<sup>b</sup> Applied Science Laboratory Europe, GE Healthcare, Stockholm, Sweden

<sup>c</sup> Department of Medical Physics, Uppsala University Hospital, Uppsala, Sweden

<sup>d</sup> Antaros Medical, Mölndal, Sweden

## Differences of the multi-echo scan of the first subject and how these were handled

The multi-echo scan of the first subject differed from the multi-echo scans of the later subjects in the following way: TR/TE<sub>1</sub>/ΔTE = 22.5/2.06/1.07 ms, 15 unipolar echoes in 3 echo trains, flip angle = 7°, field of view (right-left × anterior-posterior × feet-head) = 480×202×56 mm<sup>3</sup>. The subject was scanned again at a later visit using both the original protocol as well as the protocol used for the other subjects. Differences in BAT FF and R<sub>2</sub>\* for the two protocols were calculated, and these values were used the correct the values from the first visit.

## Supplementary table

**Supplementary Table S1.** Simple linear regressions of all continuous variables against all other continuous variables.

| Variable 1\Variable 2                   | Age (years) | Height (cm) | Weight (kg)        | BMI (kg/m <sup>2</sup> ) | Total BAT GUR (μmol/min) | SCF <sub>neutral</sub> (°C) | SCF <sub>cold</sub> (°C) | PNR <sub>neutral</sub> (°C) | PNR <sub>cold</sub> (°C) | BAT FF <sub>2e</sub> (%) | BAT FF <sub>15e</sub> (%) | BAT R <sub>2</sub> * (s <sup>-1</sup> ) |
|-----------------------------------------|-------------|-------------|--------------------|--------------------------|--------------------------|-----------------------------|--------------------------|-----------------------------|--------------------------|--------------------------|---------------------------|-----------------------------------------|
| Age (years)                             | -           | 0.28/0.12   | <b>0.0065/0.54</b> | <b>0.0040/0.58</b>       | 0.40/0.072               | <b>0.015/0.46</b>           | <b>0.021/0.43</b>        | 0.12/0.22                   | 0.16/0.19                | <b>0.028/0.40</b>        | 0.082/0.27                | 0.061/0.31                              |
| Height (cm)                             | -           | -           | <b>0.019/0.44</b>  | 0.28/0.12                | 0.51/0.044               | 0.58/0.032                  | 0.70/0.015               | 0.82/0.0051                 | 0.61/0.028               | 0.25/0.13                | 0.23/0.14                 | 0.35/0.088                              |
| Weight (kg)                             | -           | -           | -                  | <b>0.000012/0.86</b>     | 0.057/0.32               | <b>0.027/0.40</b>           | <b>0.011/0.49</b>        | 0.93/0.00088                | 0.69/0.017               | <b>0.0059/0.55</b>       | <b>0.014/0.47</b>         | <b>0.010/0.50</b>                       |
| BMI (kg/m <sup>2</sup> )                | -           | -           | -                  | -                        | <b>0.039/0.36</b>        | <b>0.0093/0.51</b>          | <b>0.00086/0.69</b>      | 0.77/0.0088                 | 0.84/0.0042              | <b>0.0043/0.57</b>       | <b>0.014/0.47</b>         | <b>0.0054/0.56</b>                      |
| Total BAT GUR (μmol/min)                | -           | -           | -                  | -                        | -                        | 0.055/0.32                  | <b>0.0051/0.56</b>       | 0.15/0.20                   | 0.072/0.29               | <b>0.0075/0.53</b>       | <b>0.0049/0.56</b>        | 0.072/0.29                              |
| SCF <sub>neutral</sub> (°C)             | -           | -           | -                  | -                        | -                        | -                           | <b>0.000091/0.80</b>     | 0.70/0.016                  | 0.97/0.00016             | <b>0.0030/0.60</b>       | <b>0.0011/0.67</b>        | <b>0.00037/0.73</b>                     |
| SCF <sub>cold</sub> (°C)                | -           | -           | -                  | -                        | -                        | -                           | -                        | 0.82/0.0052                 | 0.81/0.0063              | <b>0.00024/0.76</b>      | <b>0.00035/0.74</b>       | <b>0.00076/0.69</b>                     |
| PNR <sub>neutral</sub> (°C)             | -           | -           | -                  | -                        | -                        | -                           | -                        | -                           | <b>0.00010/0.79</b>      | 0.65/0.022               | 0.44/0.061                | 0.70/0.015                              |
| PNR <sub>cold</sub> (°C)                | -           | -           | -                  | -                        | -                        | -                           | -                        | -                           | -                        | 0.36/0.083               | 0.23/0.14                 | 0.48/0.050                              |
| BAT FF <sub>2e</sub> (%)                | -           | -           | -                  | -                        | -                        | -                           | -                        | -                           | -                        | -                        | <b>0.00000048/0.93</b>    | <b>0.00064/0.70</b>                     |
| BAT FF <sub>15e</sub> (%)               | -           | -           | -                  | -                        | -                        | -                           | -                        | -                           | -                        | -                        | -                         | <b>0.000066/0.81</b>                    |
| BAT R <sub>2</sub> * (s <sup>-1</sup> ) | -           | -           | -                  | -                        | -                        | -                           | -                        | -                           | -                        | -                        | -                         | -                                       |

*p*-value/R<sup>2</sup>. Statistically significant correlations in **bold**.
